# Supplementary material for: Peatland development reconstruction and complex biological responses to permafrost thawing in Western Siberia
Source: Copernicus journal article supplement (doi:10.5194/bg-22-4797-2025), 2025-09-22
Supplement: Supplementary file 1 [file bg-22-4797-2025-supplement.pdf]

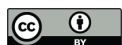

*Supplement of*

## **Peatland development reconstruction and complex biological responses to permafrost thawing in Western Siberia**

**Agnieszka Halaś et al.**

*Correspondence to:* Agnieszka Halaś ([aj.halas@twarda.pan.pl](mailto:aj.halas@twarda.pan.pl))

The copyright of individual parts of the supplement might differ from the article licence.

## Supplementary material

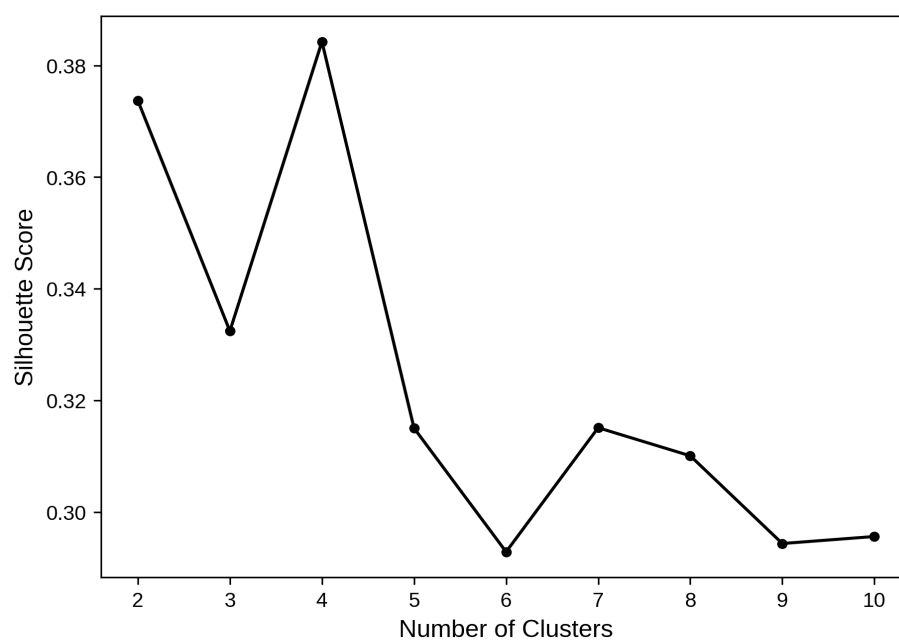

**Figure S1** Silhouette Score for different number of clusters in testate amoebae samples from the Kh-K1 core. The highest silhouette score is observed at four clusters.
